# Supplementary material
Source: Springer Nature journal article supplement (https://www.springermedizin.de/resource/supplementary/40170_2013_24_MOESM4_ESM.pdf/25787662)

# Normal Physiology

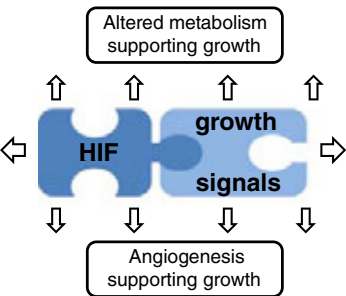

# Cancer

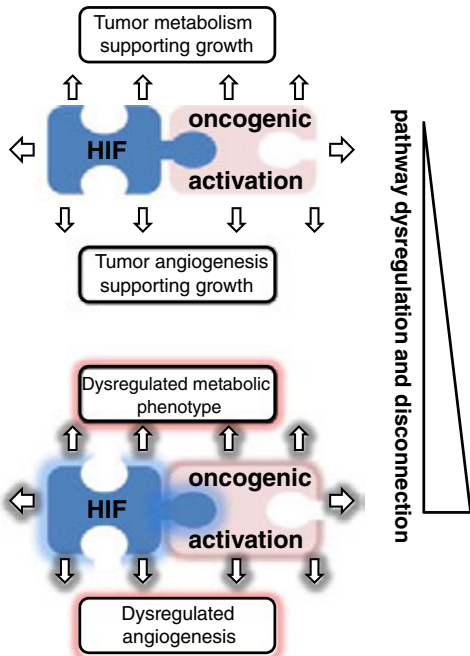

Supplement: MOESM4 [file 25787662]
